# Supplementary material for: Optimal Signal Processing in Small Stochastic Biochemical Networks
Source: PLoS One. 2007 Oct 24;2(10):e1077. doi: 10.1371/journal.pone.0001077 (PMC2034356; doi:10.1371/journal.pone.0001077)
Supplement: Table S1 — Comparison of presence or absence of proteolysis to presence or absence of negative auto-regulation. Fisher exact probability test reveals signficant (p = 0.013) positive association. This confirms our prediction that transcription factors which undergo proteolysis, and therefore have faster response times, are less able to regulate noise using the temporal filtering, and they require the presence of negative auto-regulation to help control the noise. (0.03 MB XLS) [file pone.0001077.s015.xls]

## Sheet: Sheet1
	Negative Feedback	No Negative Feedback
Proteolysis	9	4
No Proteolysis	44	88
