# Supplementary material for: Optimal Signal Processing in Small Stochastic Biochemical Networks
Source: PLoS One. 2007 Oct 24;2(10):e1077. doi: 10.1371/journal.pone.0001077 (PMC2034356; doi:10.1371/journal.pone.0001077)
Supplement: Table S2 — 145 transcription factors in E. coli gene regulatory network as obtained from RegulonDB [4]. Number of cleavage sites is based on MEROPS [5] database and autoregulation (repression = −1, excitation = +1, none = 0) is based on data from [4]. (0.05 MB XLS) [file pone.0001077.s016.xls]

## Sheet: Sheet1
Transcription Factor	UniProt	Number of Cleavage Sites	Feedback
AraC	P0A9E0	0	-1
ArgR	P17893	0	-1
AsnC	P44337	0	-1
BetI	P17446	0	-1
CpxR	P0AE88	0	1
CynR	P27111	0	-1
CysB	P0A9F3	0	-1
DnaA	P03004	0	-1
DsdC	P46068	0	-1
EmrR	P0ACR9	0	-1
FadR	P0A8V6	1	0
FruR	P0ACP1	0	0
Fur	P0A9A9	0	-1
GalR	P03024	0	0
GalS	P25748	0	-1
GcvA	P0A9F6	0	-1
GlpR	P0ACL0	0	0
HNS	P0ACF8	1	-1
IdnR	P39343	0	1
IlvY	P05827	0	-1
IscR	Q8GLE9	0	-1
LacI	P03023	0	0
MalT	P06993	0	0
MarA	P0ACH5	0	1
MarR	P27245	0	-1
MazEF	P0AE72	0	0
MelR	P0ACH8	0	-1
MetJ	P0A8U6	1	-1
MetR	P0A9F9	0	-1
MhpR	P77569	0	0
ModE	P0A9G8	0	0
NagC	P0AF20	0	-1
PdhR	P0ACL9	0	-1
PspF	P37344	0	0
PurR	P0ACP7	1	-1
PutA	P09546	0	-1
RbsR	P0ACQ0	1	-1
RhaR	P09378	0	1
RhaS	P09377	0	0
Rob	P0ACI0	0	0
SoxR	P0ACS2	0	-1
SoxS	P0A9E2	1	-1
TorR	P38684	0	-1
TreR	P36673	0	0
TrpR	P0A881	1	-1
UxuR	P39161	0	-1
XapR	P23841	0	0
XylR	P0ACI3	0	0
AcrR	P0ACS9	0	-1
Ada	P06134	2	-1
AdiY	P33234	0	0
AgaR	P0ACK2	0	-1
AllR	P0ACN4	0	-1
AllS	P0ACR0	0	0
AlpA	P33997	0	0
AlsR	P0ACS7	0	-1
AppY	P05052	0	0
ArcA	P0A9Q1	0	0
ArgP	P0A8S1	0	0
AtoC	Q06065	0	0
BaeR	P69228	0	1
BirA	P69228	0	0
CadC	P23890	0	1
CaiF	P0AE58	0	0
cbl	Q47083	0	0
CsgD	P52106	0	1
CsiR	P37338	0	0
CspA	P0A9X9	1	0
CueR	P0A9G4	0	0
CusR	P0ACZ8	0	1
DcuR	P0AD01	0	0
DeoR	P0ACK5	0	0
DhaR	P76016	0	0
EbgR	P06846	0	0
EnvY	P10805	0	0
EvgA	P0ACZ4	0	1
ExuR	P0ACL2	0	-1
FNR	P0A9E5	0	-1
FabR	P0ACU5	0	0
FecI	P23484	1	1
FhlA	P19323	0	1
Fis	P0A6R3	0	-1
FlhDC	P0A6R3	0	0
FucR	P0ACK8	0	1
GadE	P63201	0	1
GadW	P63203	0	0
GadX	P37639	0	1
GatR	P36930	0	0
GcvR	P0A9I3	1	0
GlcC	P0ACL5	0	-1
GntR	P0ACP5	0	0
GutM	P15081	0	1
GutR	P15082	0	0
HU	P0ACF0	0	0
HcaR	Q47141	0	-1
HdfR	P0A8R9	0	0
HyfR	P71229	0	1
IclR	P16528	0	-1
KdgR	P76268	0	0
KdpE	P21866	0	0
LctR	P0ACL7	0	-1
LeuO	P10151	0	0
LexA	P0A7C2	1	-1
LrhA	P36771	0	1
Lrp	P0ACJ0	-1	-1
LsrR	P76141	0	0
LysR	P03030	0	-1
MalI	P18811	0	-1
Mlc	P50456	0	-1
MngR	P13669	0	-1
MntR	P0A9F1	0	0
MtlR	P0AF10	0	-1
Nac	Q47005	0	-1
NadR	P27278	0	0
NanR	P0A8W0	0	0
NarL	P0AF28	0	0
NarP	P31802	0	0
NhaR	P52692	0	0
NikR	P0A6Z6	0	-1
NorR	Q8FEN6	0	0
NsrR	P0AF63	0	0
NtrC	P0AFB9	0	0
OmpR	P0AA16	0	0
Oxyr	P0ACQ4	0	-1
Paax	P76086	0	0
PepA	P68767	0	0
PhoB	P0AFJ5	0	1
PrpR	P77743	0	-1
QseB	P52076	0	1
RcsB	P69407	0	0
RtcR	P38035	0	0
SdaR	P37047	0	1
SdiA	P07026	0	0
SlyA	P0A8W2	0	0
TdcA	P0ACQ7	0	1
TdcR	P11866	0	0
UhpA	P0AGA6	0	0
UidR	P0ACT6	0	-1
UlaR	P0A9W0	0	0
YdeO	P76135	0	0
YiaJ	P37671	0	0
ZntR	P0ACS5	0	0
ZraR	P14375	0	1
Zur	P0AC51	0	0
yeil	P0A9E9	0	0
